# Supplementary material for: Long‐Term Effects of Transcatheter Aortic Valve Implantation on Coronary Hemodynamics in Patients With Concomitant Coronary Artery Disease and Severe Aortic Stenosis
Source: PubMed Central journal article supplement — J Am Heart Assoc. 2020 Feb 27;9(5):e015133. doi: 10.1161/JAHA.119.015133 (PMC7335578; doi:10.1161/jaha.119.015133), 2020-02-27
Supplement: JAH3-9-e015133-s001.pdf [file JAH3-9-e015133-s001.pdf]

# **Supplemental Material**

Figure S1. Boxplot of the PdPa values, for all the different time points.

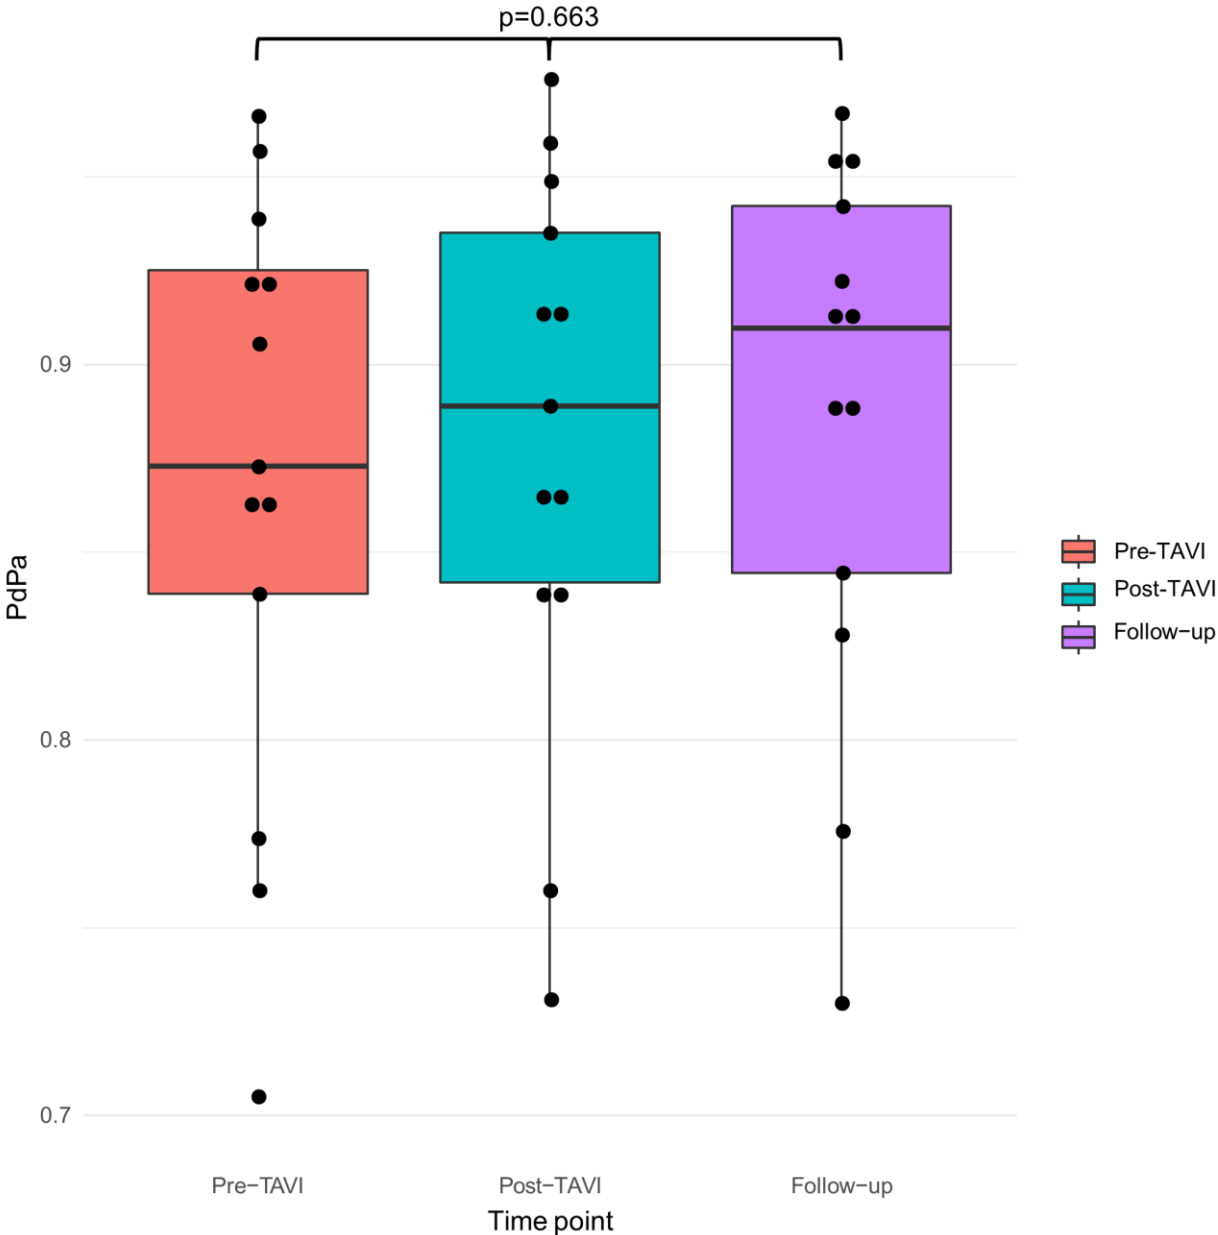

Individual values are depicted as the dots. Pd: Distal pressure, Pa: Aortic pressure, PdPa: Distal pressure divided by Aortic pressure.

Figure S2. Boxplot of the PdPa-flow values, for all the different time points.

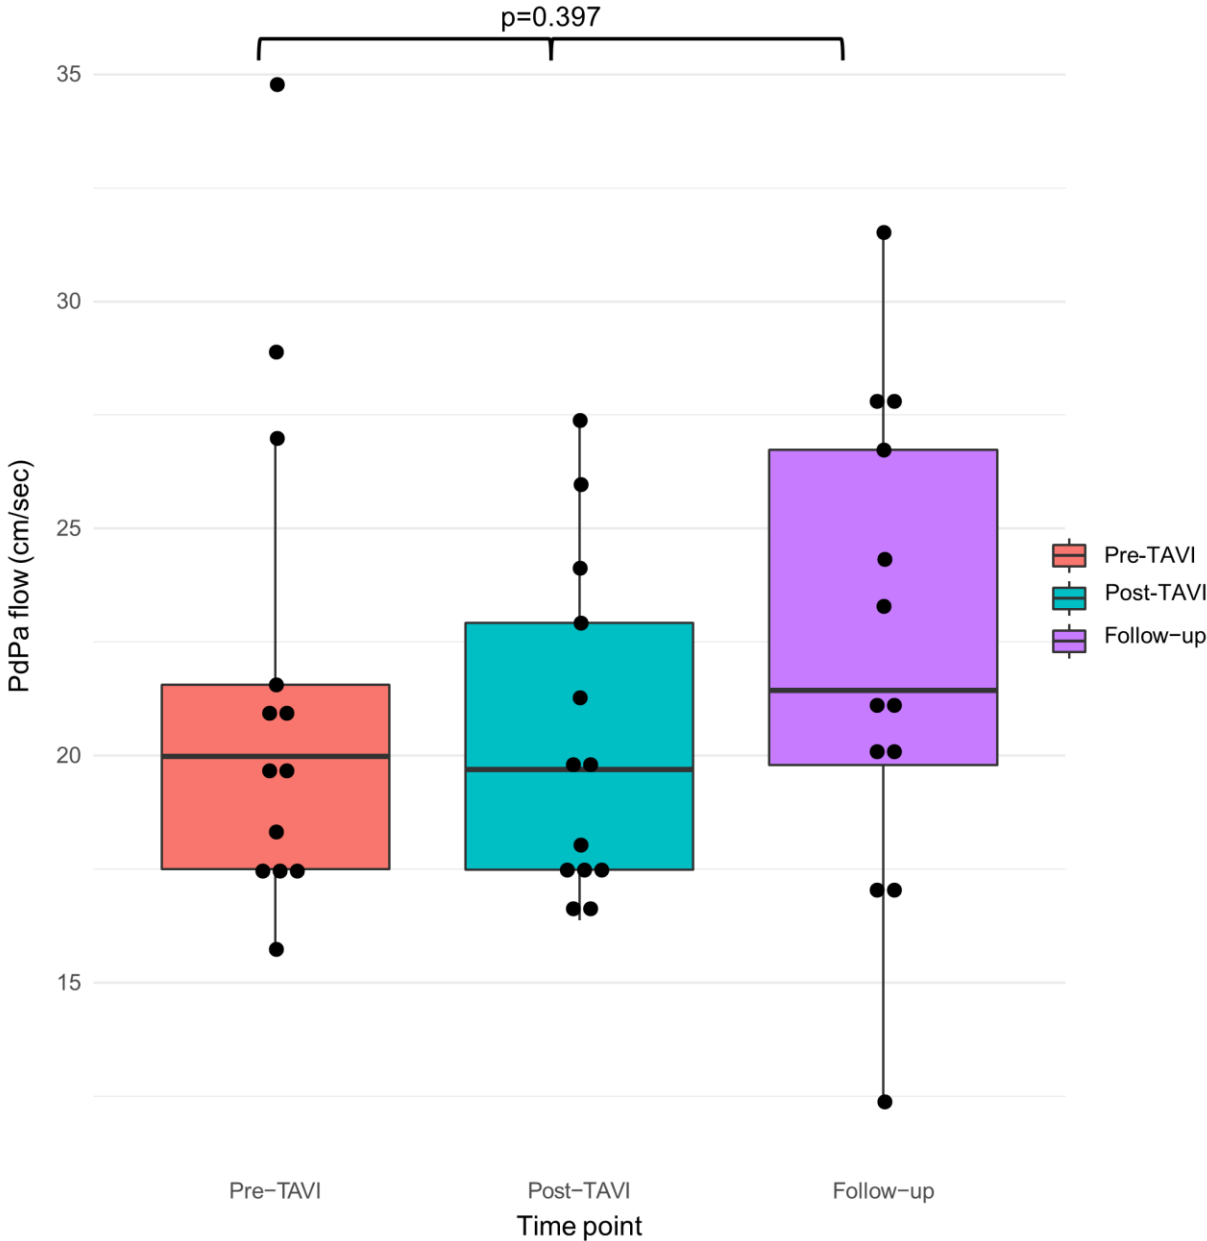

Individual values are depicted as the dots. Pd: Distal pressure, Pa: Aortic pressure, PdPa: Distal pressure divided by Aortic pressure.

Figure S3. Boxplot of the HSRi values, for all the different time points.

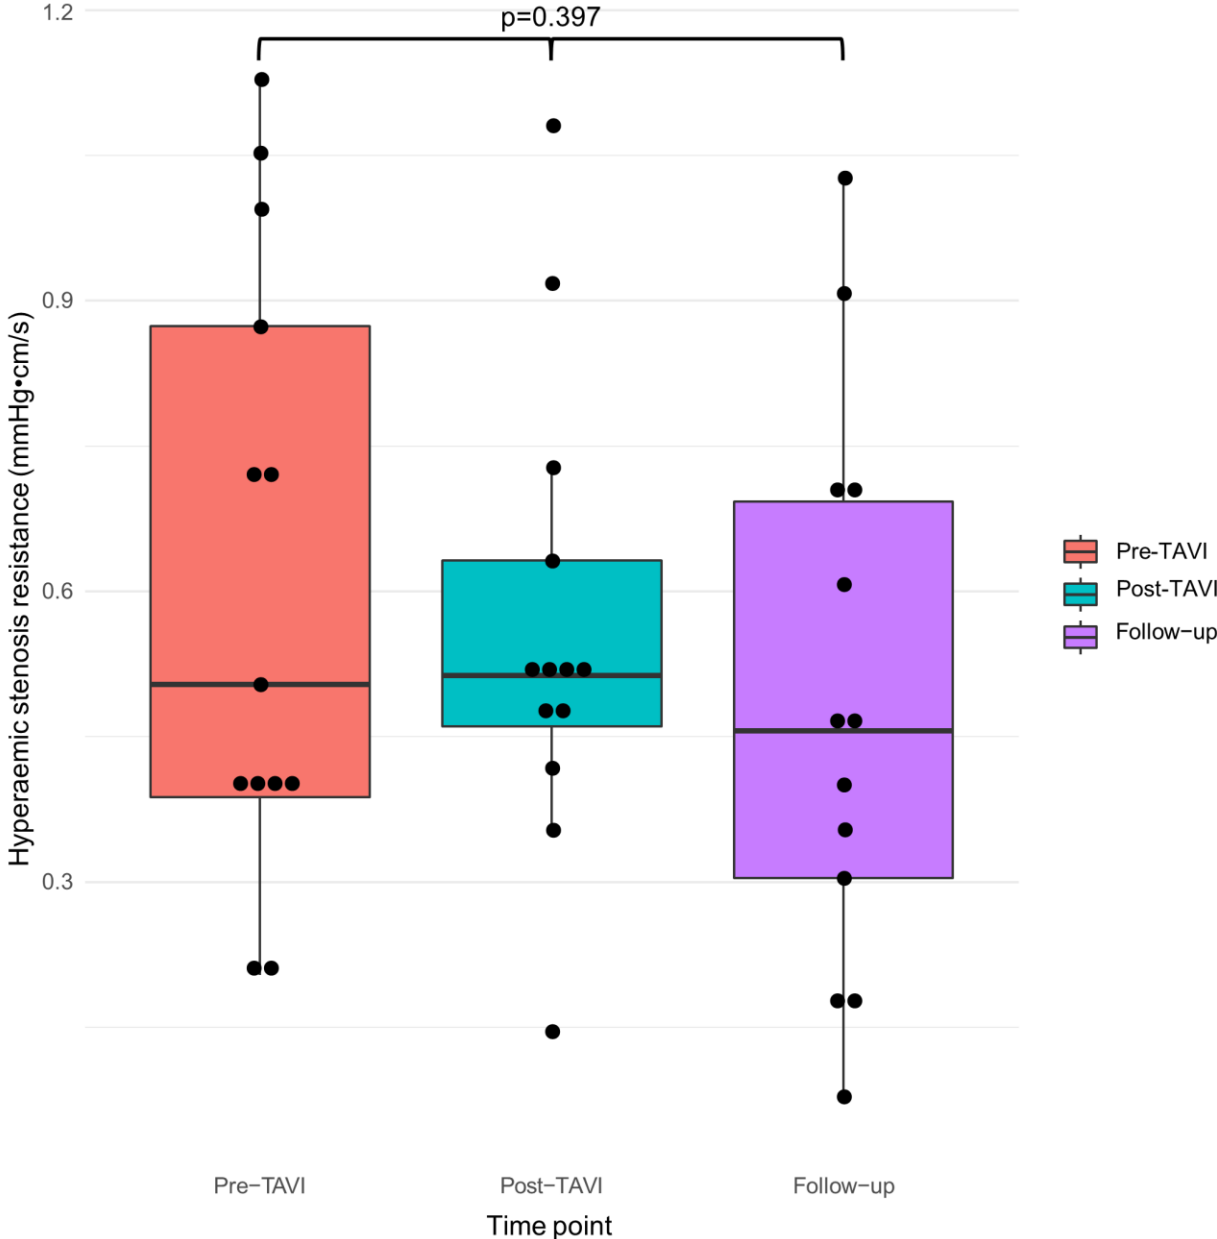

Individual values are depicted as the dots. HSRi: Hyperemic Stenosis Resistance Index.
